1 **Membrane Ca<sup>2+</sup> permeability and IP3R2 dependent Ca<sup>2+</sup>-induced Ca<sup>2+</sup> release are**  
2 **essential for astrocytic intracellular Ca<sup>2+</sup> elevation upon neuronal stimulation at the**  
3 **mouse hippocampal CA3 - CA1 excitatory synapses**

4 Jarand B. Hjukse<sup>1</sup>, Gry Fluge Vindedal<sup>1</sup>, Rolf Sprengel<sup>2</sup>, Vidar Jensen<sup>1\*</sup>, Erlend A.  
5 Nagelhus<sup>1,3†</sup>, Wannan Tang<sup>1,4\*</sup>

6 <sup>1</sup>GliaLab and Letten Centre, Division of Physiology, Department of Molecular Medicine,  
7 Institute of Basic Medical Sciences, University of Oslo, Oslo, 0372, Norway

8 <sup>2</sup>Research Group of the Max Planck Institute for Medical Research at the Inst. for Anatomy  
9 and Cell Biology of the Heidelberg University, 69120, Heidelberg, Germany

10 <sup>3</sup>Oslo University Hospital, Department of Neurology, 0372, Oslo, Norway

11 <sup>4</sup>Department of Clinical and Molecular Medicine, Norwegian University of Science and  
12 Technology (NTNU), Trondheim, 7491, Norway

13 † Deceased

14 **\*Correspondence**

15 [vidar.jensen@medisin.uio.no](mailto:vidar.jensen@medisin.uio.no)

16 [wannan.tang@medisin.uio.no](mailto:wannan.tang@medisin.uio.no)

17 **Keywords:** astrocytes, Ca<sup>2+</sup> signals, Na<sup>+</sup>/Ca<sup>2+</sup> exchanger (NCX), P2X receptor, IP3R2 receptor,  
18 membrane Ca<sup>2+</sup> permeability, hippocampus, two-photon imaging

19 **Abstract**

20 Astrocytes are intricately involved in the activity of neural circuits, however, their basic  
21 physiology of interacting with neurons remains controversial. Using dual-indicator two-photon  
22 imaging of neurons and astrocytes during stimulations of hippocampal CA3 - CA1 Schaffer  
23 collateral (Scc) excitatory synapses, we report that under physiological conditions, the  
24 increased glutamate released from the higher frequency stimulation of neurons can accelerate  
25 local astrocytic Ca<sup>2+</sup> levels. As consequences of extracellular glutamate clearance and  
26 maintaining of astrocytic intracellular Na<sup>+</sup> homeostasis, the increase of astrocytic membrane  
27 Ca<sup>2+</sup> permeability via Na<sup>+</sup>/Ca<sup>2+</sup> exchanger (NCX) reverse mode is the primary reason of  
28 eliciting astrocytic intracellular Ca<sup>2+</sup> elevation upon neuronal stimulation. This Ca<sup>2+</sup>-induced  
29 Ca<sup>2+</sup> release is dependent on inositol triphosphate receptor type 2 (IP3R2). In addition, ATP  
30 released from Scc excitatory synapses can contribute to this molecular mechanism of Ca<sup>2+</sup>-  
31 induced Ca<sup>2+</sup> release in astrocytes.

32 **Introduction**

33 Modern neuroimaging technology has revolutionized our knowledge on the function of  
34 astrocytes, the predominant glial cell type in the brain. However, mechanisms underlying  
35 neuronal stimulation-evoked astrocytic Ca<sup>2+</sup> signals are debated and vary between species,  
36 brain regions, developmental stages and astrocytic subcellular compartments (Saab et al. 2012;  
37 Doengi et al. 2009; Droste et al. 2017; Zhang et al. 2019; Santello, Toni, and Volterra 2019;  
38 Tang et al. 2015; Deitmer and Rose 2010). As important contributors to elicit astrocytic Ca<sup>2+</sup>  
39 responses upon neuronal stimulation, various neurotransmitters, ion channels, G-protein  
40 coupled receptors, and neurotransmitter transporters embedded in the astrocytic membrane are  
41 currently involved in this controversy (Bazargani and Attwell 2016; Santello, Toni, and  
42 Volterra 2019; Deitmer and Rose 2010).

43 The basal level of astrocytic intracellular  $\text{Ca}^{2+}$  at the resting state is tightly regulated at  
44 low concentrations (about 100 nM or below), which is necessary for maintaining astrocytic  
45 physiological function (Deitmer and Rose 2010; King et al. 2020; Shigetomi et al. 2010). Unlike  
46 neurons, few pathways allowing extracellular  $\text{Ca}^{2+}$  entry are present in the astrocytic  
47 membrane, including receptors, channels, exchangers and pumps. This leads to a highly  
48 restricted  $\text{Ca}^{2+}$  permeability of the astrocytic membrane (Bazargani and Attwell 2016).  
49 However, whether the neuronal stimulation-evoked astrocytic  $\text{Ca}^{2+}$  increases are associated  
50 with relaxation of this limited astrocytic membrane  $\text{Ca}^{2+}$  permeability has remained unclear.

## 51 Results and Discussion

52 At hippocampal CA3 - CA1 Schaffer collateral/commissural fibers (Scc), glutamate is the main  
53 neurotransmitter released at excitatory synapses. The glutamate release contributes to the  
54 increase of astrocytic intracellular  $\text{Ca}^{2+}$  as shown in our previous study (Tang et al. 2015). Thus,  
55 we first quantified the amount of glutamate released from the Scc synapses with three  
56 incremental stimulation protocols (20 Hz for 1 sec, 20 Hz for 10 sec and theta burst with 5 trains  
57 at 100 Hz repeated 5 times every 200 msec). The glutamate released from respective neuronal  
58 stimulation was measured by a genetically encoded fluorescent glutamate sensor iGluSnFR  
59 under *hSYN* promoter expressed with a rAAV vector (Marvin et al. 2013). Stimulation of Scc  
60 yielded a sharp increase in iGluSnFR fluorescence throughout the *stratum radiatum* (**Figure**  
61 **1A and 1B**), albeit with lower amplitudes distant to the stimulating electrode (**Figure 1B – 1D**),  
62 showing iGluSnFR is capable of detecting the extracellular glutamate increase (**Figure 1E –**  
63 **1G and 1H left**). Even during the high frequency theta burst stimulation, iGluSnFR transients  
64 did accompany every stimulation train, with a recovery time of 40 – 50 msec (**Figure 1G and**  
65 **1H right**). Intriguingly, the theta burst protocol evoked an iGluSnFR fluorescence increase of  
66 significant higher amplitude than other two protocols (**Figure 1H left**), demonstrating a greater  
67 amount of glutamate release upon higher level of neuronal stimulation.

68 To further investigate the dynamics of astrocytic intracellular  $\text{Ca}^{2+}$  increases in relation  
69 to the amount of glutamate released from the Scc synapses, we used wild-type mice transduced  
70 with a mixture of rAAV-*hSYN*-jRGECO1a (Dana et al. 2016) and rAAV-*GFAP*-GCaMP6f  
71 (Enger et al. 2015) to simultaneously reveal neuronal and astrocytic  $\text{Ca}^{2+}$  signals, respectively.  
72 Both 20 Hz for 1sec and theta burst stimulation of Scc (**Figure 2A**) evoked distinct increases  
73 in neuronal jRGECO1a (red) and astrocytic GCaMP6f (green) fluorescence (**Figure 2B and**  
74 **2C**). In wild-type mice, the relative latency of astrocytic  $\text{Ca}^{2+}$  increases in all compartments  
75 occurred about 2.5 sec after the neuronal  $\text{Ca}^{2+}$  rise with 20 Hz for 1 sec stimulation (**Figure**  
76 **2D**). However, a significant shorter relative latency in astrocytic somata and processes (about  
77 1.7 sec) was detected by using theta burst stimulation (**Figure 2D**), indicating that a higher  
78 frequency stimulation resulted in a faster onset of astrocytic  $\text{Ca}^{2+}$  increases. Thus, together with  
79 the above iGluSnFR experiment, we show that the greater glutamate released from the higher  
80 frequency stimulation of neurons accelerated the local astrocytic  $\text{Ca}^{2+}$  increases.

81 Glutamate transporters (GLT/GLAST) in astrocytic membranes are responsible for the  
82 uptake of neuronal released glutamate from the extracellular space (ECS). The entry of the  
83 glutamate via the transporter is accompanied by the elevation of intracellular  $\text{Na}^+$  concentration  
84 in astrocytes, which subsequently can activate the reverse mode of astrocytic  $\text{Na}^+/\text{Ca}^{2+}$   
85 exchanger (NCX) to export  $\text{Na}^+$  from astrocytes and to import  $\text{Ca}^{2+}$  into astrocytes (Deitmer  
86 and Rose 2010; Santello, Toni, and Volterra 2019). When we blocked the glutamate transporter  
87 with its specific inhibitor DL-threo- $\beta$ -Benzyloxyaspartic acid (DL-TBOA), a severe reduction  
88 of neuronal field excitatory postsynaptic potential (fEPSP) about 75% (**Supplementary Figure**  
89 **1A**) was observed, and astrocytic  $\text{Ca}^{2+}$  increases upon Scc stimulation (20 Hz for 10 sec)  
90 showed a significant reduction in processes (**Supplementary Figure 1B**). Although the rise  
91 time both in somata and processes was shortened, and the response duration in the somata was

92 prolonged, astrocytic  $\text{Ca}^{2+}$  increases still remained high (**Supplementary Figure 1B**),  
93 demonstrating both glutamate transporters and other potential triggering mechanisms are  
94 simultaneously contributing to the rise of astrocytic  $\text{Ca}^{2+}$  signals.

95 As the uptake of glutamate in astrocytes could lead to a direction reverse of NCX, a  
96 potent and selective inhibitor of NCX reverse mode, KB-R7943, was applied to block the  
97 extracellular  $\text{Ca}^{2+}$  entry through NCX. We asked, whether this indirect pathway of increasing  
98 astrocytic  $\text{Ca}^{2+}$  membrane permeability through NCX is essential for triggering astrocytic  $\text{Ca}^{2+}$   
99 increases. Surprisingly, with comparable neuronal stimulation strength revealed by the  
100 jRGECO1a signals before and after bath application of KB-R7943, astrocytic  $\text{Ca}^{2+}$  increases  
101 were almost completely abolished (**Figure 3A – C and 1G**). This suggested that a  $\text{Ca}^{2+}$ -induced  
102  $\text{Ca}^{2+}$  release mechanism involving the import of extracellular  $\text{Ca}^{2+}$  by the the reverse mode of  
103 NCX is essential for initiating the internal release of  $\text{Ca}^{2+}$  from ER stores. In addition, the  
104 astrocytic  $\text{Ca}^{2+}$  increases are abolished in *Itpr2*<sup>-/-</sup> mice (**Supplementary Figure 2**), suggesting  
105 this NCX-mediated  $\text{Ca}^{2+}$ -induced  $\text{Ca}^{2+}$  release is dependent on inositol triphosphate receptor  
106 type 2 (IP3R2).

107 However, when we repeated the same protocol with a higher neuronal stimulation  
108 strength, astrocytic  $\text{Ca}^{2+}$  increases could be measured despite the presence of KB-R7943. Since  
109 ATP is known as another important neurotransmitter released at excitatory synapses (Deitmer  
110 and Rose 2010; Bazargani and Attwell 2016), the binding of ATP to P2X receptor channels  
111 (P2XRs) could potentially lead to extracellular  $\text{Ca}^{2+}$  entry, thereby increasing the astrocytic  
112  $\text{Ca}^{2+}$  membrane permeability. Therefore, we next performed experiments blocking both NCX  
113 reverse mode and P2XRs simultaneously with KB-R7943 and Pyridoxalphosphate-6-  
114 azophenyl-2',4'-disulfonic acid tetrasodium salt (PPADS), respectively. During this double  
115 blockage, the  $\text{Ca}^{2+}$  increases in all microdomains of astrocytes were completely suppressed  
116 (**Figure 3D – 3F**) despite of a 2-fold increase in neuronal stimulation strength measured by the  
117 jRGECO1a fluorescence (**Figure 3G**). As expected, washing in of just artificial cerebrospinal  
118 fluid (ACSF) as controls did not change levels of astrocytic  $\text{Ca}^{2+}$  elevation (**Figure 3H**). These  
119 results identify extracellular  $\text{Ca}^{2+}$  influxes through NCX and P2XRs on the astrocytic  
120 membrane as primary initiators for the  $\text{Ca}^{2+}$  elevation in astrocytes. Thus, the astrocytic  
121 membrane  $\text{Ca}^{2+}$  permeability and the IP3R2 dependent  $\text{Ca}^{2+}$ -induced  $\text{Ca}^{2+}$  release mechanism  
122 via NCX and P2XRs are essential for triggering the neuronal stimulation-evoked  $\text{Ca}^{2+}$  increase  
123 in astrocytes at the hippocampal CA3-CA1 Scc excitatory synapses of adult mice.

124 Here we confirmed that the neuronal released glutamate and ATP can trigger astrocytic  
125  $\text{Ca}^{2+}$  increases at the hippocampal Scc, as suggested in our previous study (Tang et al. 2015).  
126 However, different to the pharmacological blockade of mGluRs and unspecific purinergic  
127 receptors that lead only to a partial reduction of  $\text{Ca}^{2+}$  elevation (Tang et al. 2015), we now  
128 discovered that the extracellular  $\text{Ca}^{2+}$  entry through NCX and P2XRs governs the astrocytic  
129 intracellular  $\text{Ca}^{2+}$  elevation with an IP3R2 dependent  $\text{Ca}^{2+}$ -induced  $\text{Ca}^{2+}$  release mechanism.  
130 The astrocytic membrane  $\text{Ca}^{2+}$  permeability modulated by molecules in the extracellular space  
131 (ECS) plays the essential role on neuronal stimulation-evoked astrocytic activation.

132 In other brain regions, such as olfactory bulb, retina and cerebellum, studies have shown  
133 that extracellular  $\text{Ca}^{2+}$  entry via  $\text{Ca}^{2+}$  permeable AMPA receptors or GABA transporter as  
134 important causes for inducing astrocytic  $\text{Ca}^{2+}$  elevation upon local neuronal stimulation  
135 (Doengi et al. 2009; Saab et al. 2012; Zhang et al. 2019), supporting and generalizing our  
136 conclusion on the importance of astrocytic membrane  $\text{Ca}^{2+}$  permeability. Our results are  
137 pointing out that the change of the astrocytic membrane  $\text{Ca}^{2+}$  permeability is the driving force  
138 of the  $\text{Ca}^{2+}$  elevation in astrocytes when they are activated by local neurons (**Figure 4**), which

139 is distinct from other (optional neuromodulatory) astrocytic activation pathways that involve  
140 mGluRs and G protein-coupled receptors.

## 141 **Materials and Methods**

142 **Animals.** Both male and female wild-type (C57BL6J, Janvier Labs) and *Itpr2*<sup>-/-</sup> (*Itpr2*<sup>tm1.1Chen</sup>;  
143 MGI: 3640970)(Li et al. 2005) mice at least 6 weeks of age were housed with a 12-hour  
144 light/dark cycle (light on at 8 a.m.). *Itpr2*<sup>-/-</sup> mice were backcrossed into a C57BL6J background  
145 for at least 15 generations. All experimental procedures were approved by the Norwegian Food  
146 Safety Authority (project number: FOTS 11255)

147 **Plasmid constructions and virus production.** The DNA sequences for the genetically  
148 encoded fluorescent Ca<sup>2+</sup> indicator GCaMP6f(Chen et al. 2013) and jRGECO1a(Dana et al.  
149 2016) were first amplified by PCR from pGP-CMV-GCaMP6f and pGP-CMV-NES-  
150 jRGECO1a (Addgene) with 5' BamHI and 3' HindIII, and sub-cloned into the recombinant  
151 adeno-associated virus (rAAV) vector pAAV-6P-SEWB(Shevtsova et al. 2005) for generating  
152 pAAV-*SYN*-GCaMP6f and pAAV-*SYN*-jRGECO1a, respectively. The human glial fibrillary  
153 acidic protein (*GFAP*) promoter(Hirrlinger et al. 2009) was inserted with MluI and BamHI into  
154 pAAV-*SYN*-GCaMP6f construct for obtaining pAAV-*GFAP*-GCaMP6f. Plasmid pAAV-*SYN*-  
155 iGluSnFR(Marvin et al. 2013) was used to express the genetically encoded fluorescent  
156 glutamate indicator iGluSnFR. Serotype 2/1 rAAVs from pAAV-*GFAP*-GCaMP6f, pAAV-  
157 *SYN*-jRGECO1a and pAAV-*SYN*-iGluSnFR were produced(Tang et al. 2015) and purified by  
158 AVB Sepharose affinity chromatography(Smith, Levy, and Kotin 2009), following titration  
159 with real-time PCR (rAAV titer about 1.0 – 6.0 x 10<sup>12</sup> viral genomes/mL, TaqMan Assay,  
160 Applied Biosystems). For hippocampal rAAV-transduction of both astrocytes and neurons,  
161 rAAV-*GFAP*-GCaMP6f and rAAV-*SYN*-jRGECO1a were mix 1:1.

162 **Surgical procedures and virus transduction.** Viruses were stereotactically and bilaterally  
163 injected into the brains of deeply anesthetized (mixture of zolazepam (188 mg/kg body weight),  
164 tiletamine (188 mg/kg body weight), xylazine (4.5 mg/kg body weight) and fentanyl (26 µg/kg  
165 body weight)) 6 to 8-week-old C57BL6/J and *Itpr2*<sup>-/-</sup> mice (Janvier Labs) as described(Tang et  
166 al. 2015). For transduction in adult mouse hippocampi, stereotactic coordinates relative to  
167 Bregma were: anteroposterior -2.0 mm, lateral ±1.5 mm. During injection, about 0.3 µl of  
168 purified rAAVs in total were delivered into each hippocampus with 1.5 mm in depth. All  
169 procedures were performed according to the guidelines of the local animal use and care  
170 committees.

171 **Electrophysiology and *ex vivo* two-photon Ca<sup>2+</sup> imaging.** Experiments were performed on  
172 acute hippocampal slices prepared from adult mice 2 to 6 weeks after rAAV transduction. The  
173 acute hippocampal slices were prepared as described(Tang et al. 2015) and kept at 30±1°C.  
174 Two glass electrodes filled with ACSF and positioned 100-150 µm away from each other in  
175 CA1 *stratum radiatum* served as stimulation and recording electrodes (fEPSP monitoring),  
176 respectively. In iGluSnFR experiments, DL-2-Amino-5-phosphonopentanoic acid (APV, 50  
177 µM, Tocris) was added to the ACSF to avoid the unintended N-methyl-D-aspartate receptor  
178 (NMDAR) dependent plasticity. In order to stimulate the approximate same number of axons  
179 in the iGluSnFR experiment, we adjusted the stimulation strength so that we could record a  
180 prevoelley of 1.0 mV in amplitude. In the GCaMP6f experiment we adjusted the stimulation  
181 strength to just below thresholds for eliciting a population spike on the third EPSP in a triple  
182 stimulation protocol (3 stimulation pulses with 20 ms interstimulus interval). In some  
183 experiments chemical blockers DL-TBOA (100 µM, Tocris), KB-R7943 (20 µM, Tocris), and  
184 PPADS (100 µM, Tocris) were added into ACSF. Recordings were done both before exposure  
185 to the drugs and 60 minutes post-exposure.

186 Stimulation in trains (20 Hz for 10 s, 20 Hz for 1 s, or theta burst (5 stimulation trains  
187 at 100 Hz repeated 5 times every 200 ms) were selectively applied during experiments. The  
188 GCaMP6f, jRGECO1a and iGluSnFR fluorescence were recorded by a two-photon laser  
189 scanning microscope (model “Ultima”, Prairie Technologies) with a “XLPLN 25×WMP”  
190 1.05NA water-immersion objective (Olympus, Tokyo, Japan) at 900-910 nm (for imaging  
191 GCaMP6f and iGluSnFR) or 980-1020 nm (for dual-indicator imaging) laser pulse using a  
192 “Chameleon Vision II” (Coherent, Santa Clara, CA, USA) laser. Two-photon imaging was  
193 performed with 30 s baseline followed by electrical stimulations. The recordings were done  
194 either with 1 to 5 Hz for low imaging sampling rate (512x512 px or 256x256 px), or 50 Hz for  
195 high imaging sampling rate (50x50 px, for iGluSnFR experiment).

196 **Imaging analysis.** Time-series of fluorescence images were analyzed with custom-written  
197 MATLAB (R2011b, MathWorks, Inc.) scripts. Regions of interests (ROIs) defining astrocytic  
198 compartments were selected over somata, processes and endfeet according to typical astrocyte  
199 morphology from the GCaMP6f signal. ROIs over processes were chosen at least 5 micrometer  
200 away from the perimeter of the somata. For dual-indicator latency experiment, circular ROIs of  
201 3-5  $\mu\text{m}$  in diameter were placed for both channels to obtain GCaMP6f and jRGECO1a signals  
202 simultaneously from astrocytes and neuropils, respectively. In the iGluSnFR experiment,  
203 circular ROIs of 5  $\mu\text{m}$  were placed. The relative change in fluorescence ( $\Delta F/F$ ) in each ROI,  
204 the individual traces and the histograms were all calculated and plotted by MATLAB (R2011b,  
205 MathWorks, Inc.) with custom written scripts. To identify fluorescent events, 3 times standard  
206 deviation (SD) of baseline values was used as thresholding.

207 **Statistical analysis.** Statistical analysis was performed using Prism (Version 8.0.2 for Mac  
208 OSX, GraphPad Software). Full descriptions of statistical parameter were accessed with the  
209 original data before choosing the suitable analysis. Ordinary one-way ANOVA was used for  
210 amplitude comparison of different stimulation protocols of iGluSnFR. Kruskal-Wallis test was  
211 used for amplitudes with distances measurement of iGluSNF signals. Wilcoxon test was used  
212 for measurements of recovery rate of iGluSnFR fluorescence after first, last train during theta  
213 burst stimulation, and control experiments of neuronal stimulation strength before and after  
214 drug incubation. Paired t test was performed with the relative latency of dual-indicator  
215 measurement and DL-TBOA experiment. Two-way ANOVA with multiple comparisons test  
216 (either Sidak’s multiple comparisons test, or Tukey’s multiple comparisons test) was performed  
217 with KB-R7943 and KB-R7943 + PPADS experiments, ACSF wash control and *Itpr2*<sup>-/-</sup> mice  
218 experiments.

## 219 **Acknowledgements**

220 We dedicate this work to Prof. Erlend A. Nagelhus, who tragically died on 10<sup>th</sup> January 2020.  
221 We thank Prof. Loren L. Looger for providing all genetically encoded sensors, and Johannes  
222 Helm for technical support on the two-photon microscope. This work was supported by the  
223 Research Council of Norway Grant Number 262552, the European Union’s Seventh  
224 Framework Programme for research, technological development and demonstration under grant  
225 no. 601055, and the Letten Foundation.

## 226 **Competing interests**

227 The authors declare no competing interests.

## 228 **Author Contributions**

229 Conceptualization and experimental design: E.A.N., V.J., W.T.; experimental conduct and  
230 methodology: J.B.H., G.F.V., R.S., V.J., W.T.; writing: R.S., W.T.; funding: E.A.N., W.T.

## 231 **References**

- 232 Bazargani, Narges, and David Attwell. 2016. "Astrocyte Calcium Signaling: The Third  
233 Wave." *Nature Neuroscience* 19 (2): 182–89. <https://doi.org/10.1038/nn.4201>.
- 234 Chen, Tsai Wen, Trevor J. Wardill, Yi Sun, Stefan R. Pulver, Sabine L. Renninger, Amy  
235 Baohan, Eric R. Schreiter, et al. 2013. "Ultrasensitive Fluorescent Proteins for Imaging  
236 Neuronal Activity." *Nature* 499 (7458): 295–300. <https://doi.org/10.1038/nature12354>.
- 237 Dana, Hod, Boaz Mohar, Yi Sun, Sujatha Narayan, Andrew Gordus, Jeremy P. Hasseman,  
238 Getahun Tsegaye, et al. 2016. "Sensitive Red Protein Calcium Indicators for Imaging  
239 Neural Activity." *ELife* 5 (MARCH2016). <https://doi.org/10.7554/eLife.12727>.
- 240 Deitmer, Joachim W., and Christine R. Rose. 2010. "Ion Changes and Signalling in  
241 Perisynaptic Glia." *Brain Research Reviews*.  
242 <https://doi.org/10.1016/j.brainresrev.2009.10.006>.
- 243 Doengi, Michael, Daniela Hirnet, Philippe Coulon, Hans Christian Pape, Joachim W.  
244 Deitmer, and Christian Lohr. 2009. "GABA Uptake-Dependent Ca<sup>2+</sup> Signaling in  
245 Developing Olfactory Bulb Astrocytes." *Proceedings of the National Academy of  
246 Sciences of the United States of America* 106 (41): 17570–75.  
247 <https://doi.org/10.1073/pnas.0809513106>.
- 248 Droste, Damian, Gerald Seifert, Laura Seddar, Oliver Jädtker, Christian Steinhäuser, and  
249 Christian Lohr. 2017. "Ca<sup>2+</sup>-Permeable AMPA Receptors in Mouse Olfactory Bulb  
250 Astrocytes." *Scientific Reports* 7. <https://doi.org/10.1038/srep44817>.
- 251 Enger, Rune, Wannan Tang, Gry Fluge Vindedal, Vidar Jensen, P. Johannes Helm, Rolf  
252 Sprengel, Loren L. Looger, and Erlend A. Nagelhus. 2015. "Dynamics of Ionic Shifts in  
253 Cortical Spreading Depression." *Cerebral Cortex* 25 (11): 4469–76.  
254 <https://doi.org/10.1093/cercor/bhv054>.
- 255 Hirrlinger, Johannes, Anja Scheller, Petra G. Hirrlinger, Beate Kellert, Wannan Tang,  
256 Michael C. Wehr, Sandra Goebbels, et al. 2009. "Split-Cre Complementation Indicates  
257 Coincident Activity of Different Genes in Vivo." *PLoS ONE* 4 (1).  
258 <https://doi.org/10.1371/journal.pone.0004286>.
- 259 King, Claire M., Kirsten Bohmbach, Daniel Minge, Andrea Delekate, Kaiyu Zheng, James  
260 Reynolds, Cordula Rakers, et al. 2020. "Local Resting Ca<sup>2+</sup> Controls the Scale of  
261 Astroglial Ca<sup>2+</sup> Signals." *Cell Reports* 30 (10): 3466–3477.e4.  
262 <https://doi.org/10.1016/j.celrep.2020.02.043>.
- 263 Li, Xiaodong, Aleksey V. Zima, Farah Sheikh, Lothar A. Blatter, and Ju Chen. 2005.  
264 "Endothelin-1-Induced Arrhythmogenic Ca<sup>2+</sup> Signaling Is Abolished in Atrial Myocytes  
265 of Inositol-1,4,5-Trisphosphate(IP3)-Receptor Type 2-Deficient Mice." *Circulation  
266 Research* 96 (12): 1274–81. <https://doi.org/10.1161/01.RES.0000172556.05576.4c>.
- 267 Marvin, Jonathan S., Bart G. Borghuis, Lin Tian, Joseph Cichon, Mark T. Harnett, Jasper  
268 Akerboom, Andrew Gordus, et al. 2013. "An Optimized Fluorescent Probe for  
269 Visualizing Glutamate Neurotransmission." *Nature Methods* 10 (2): 162–70.  
270 <https://doi.org/10.1038/nmeth.2333>.
- 271 Saab, Aiman S., Alexander Neumeyer, Hannah M. Jahn, Alexander Cupido, Antonia A.M.  
272 Šimek, Henk Jan Boele, Anja Scheller, et al. 2012. "Bergmann Glial AMPA Receptors  
273 Are Required for Fine Motor Coordination." *Science* 337 (6095): 749–53.  
274 <https://doi.org/10.1126/science.1221140>.
- 275 Santello, Mirko, Nicolas Toni, and Andrea Volterra. 2019. "Astrocyte Function from  
276 Information Processing to Cognition and Cognitive Impairment." *Nature Neuroscience*.

- 277 <https://doi.org/10.1038/s41593-018-0325-8>.
- 278 Shevtsova, Z., J. M.I. Malik, U. Michel, M. Bähr, and S. Kügler. 2005. “Promoters and  
279 Serotypes: Targeting of Adeno-Associated Virus Vectors for Gene Transfer in the Rat  
280 Central Nervous System in Vitro and in Vivo.” *Experimental Physiology* 90 (1): 53–59.  
281 <https://doi.org/10.1113/expphysiol.2004.028159>.
- 282 Shigetomi, Eiji, Sebastian Kracun, Michael V. Sofroniew, and Baljit S. Khakh. 2010. “A  
283 Genetically Targeted Optical Sensor to Monitor Calcium Signals in Astrocyte  
284 Processes.” *Nature Neuroscience* 13 (6): 759–66. <https://doi.org/10.1038/nn.2557>.
- 285 Smith, Richard H., Justin R. Levy, and Robert M. Kotin. 2009. “A Simplified Baculovirus-  
286 AAV Expression Vector System Coupled with One-Step Affinity Purification Yields  
287 High-Titer RAAV Stocks from Insect Cells.” *Molecular Therapy* 17 (11): 1888–96.  
288 <https://doi.org/10.1038/mt.2009.128>.
- 289 Tang, Wannan, Karolina Szokol, Vidar Jensen, Rune Enger, Chintan A. Trivedi, Øivind  
290 Hvalby, P. Johannes Helm, Loren L. Looger, Rolf Sprengel, and Erlend A. Nagelhus.  
291 2015. “Stimulation-Evoked Ca<sup>2+</sup> Signals in Astrocytic Processes at Hippocampal CA3-  
292 CA1 Synapses of Adult Mice Are Modulated by Glutamate and ATP.” *Journal of*  
293 *Neuroscience* 35 (7): 3016–21. <https://doi.org/10.1523/JNEUROSCI.3319-14.2015>.
- 294 Zhang, Rong wei, Wen jie Du, David A. Prober, and Jiu lin Du. 2019. “Müller Glial Cells  
295 Participate in Retinal Waves via Glutamate Transporters and AMPA Receptors.” *Cell*  
296 *Reports* 27 (10): 2871-2880.e2. <https://doi.org/10.1016/j.celrep.2019.05.011>.
- 297

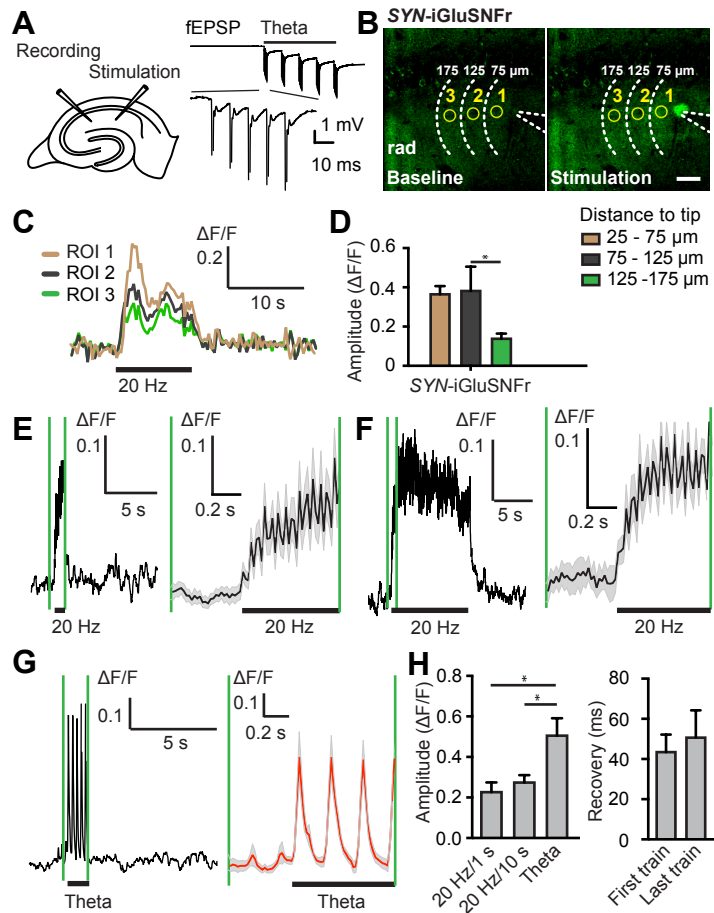

**Figure 1. Neuronal stimulation-evoked elevation of extracellular glutamate levels.** (A) Left, schematic drawing of the electrode placement in the hippocampal acute slice; right, representative trace of fEPSP (expanded in bottom trace) recorded during theta burst stimulations. (B) Images of SYN-iGluSnFr fluorescence in adult mouse hippocampus before (baseline) and after 20 Hz for 10 sec Scc stimulation. Dashed lines indicate position of the stimulation electrode and distance to the electrode tip. Scale bar, 10  $\mu\text{m}$ ; rad, *stratum radiatum*. (C) Representative traces of three regions of interest (ROIs 1-3) indicated in the images of (B). Black bar indicates 20 Hz for 10 sec Scc stimulation. (D) Amplitude of stimulation-evoked (20 Hz, 10 sec) extracellular iGluSnFr fluorescence at different distances from the stimulation electrode ( $P = 0.0059$ ,  $n_{25-75\mu\text{m}} = 7$ ,  $n_{75-125\mu\text{m}} = 7$ ,  $n_{125-175\mu\text{m}} = 6$ ). (E) – (G) Representative traces of SYN-iGluSnFr fluorescence during neuronal stimulation (indicated with bar) at 20 Hz for 1 sec (E), at 20 Hz for 10 sec (F) and theta burst (G). Traces between the green vertical lines are expanded at the right side. Grey shades indicate the range of standard error mean (SEM). (H) Left, amplitudes of stimulation-evoked extracellular iGluSnFr fluorescence ( $P = 0.0059$ ,  $F_{\text{Genotype}}(2, 26) = 6.285$ ,  $n_{20\text{Hz}/1\text{s}} = 9$ ,  $n_{20\text{Hz}/10\text{s}} = 11$ ,  $n_{\text{Theta}} = 9$ ). Right, iGluSnFr fluorescence recovery rate of first and last train during theta burst stimulation ( $P = 0.8750$ ,  $n = 8$ ). Asterisk in (D) and (H) indicates values that differ significantly from each other.



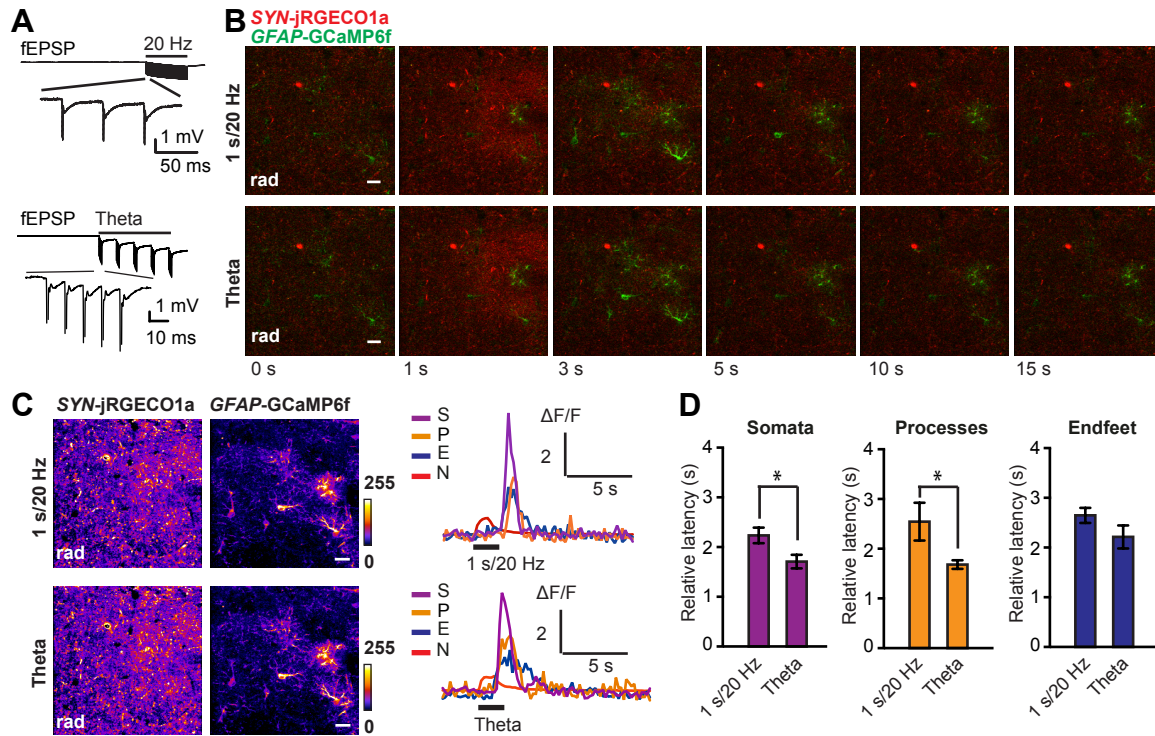

**Figure 2. Dual-indicator two-photon imaging of  $\text{Ca}^{2+}$  signals in acute wild-type mouse hippocampal slices transduced with rAAV-SYN-jRGECO1a and rAAV-GFAP-GCaMP6f with two stimulation protocols.** (A) Representative trace of fEPSP (expanded in bottom trace) recorded during 20 Hz for 1 sec (top) and theta burst (bottom) stimulation. (B) Time series of GFAP-GCaMP6f (green) and SYN-jRGECO1a (red) fluorescence images with two stimulation protocols of the Scc. (C) Left, standard deviation images of jRGECO1a and GCaMP6f fluorescence intensities from a time series recording with above mentioned two stimulation protocols; right, representative traces of the neuronal (N) and astrocytic  $\text{Ca}^{2+}$  signals with two stimulation protocols. S, astrocytic somata; P, astrocytic process. Black bar indicates Scc stimulation. (D) Bar diagram showing the latency between the onset of the neuronal jRGECO1a fluorescence transient and the one of astrocytic GCaMP6f fluorescence transients in somata (left), processes (middle) and endfeet (right) with two Scc stimulation protocols ( $P_{\text{somata}} = 0.035$ ,  $n = 27$ ;  $P_{\text{processes}} = 0.0023$ ,  $n = 79$ ;  $P_{\text{endfeet}} = 0.082$ ,  $n = 16$ ). Asterisks indicate values that differ significantly from each other. Scale bar, 10  $\mu\text{m}$ , rad, *stratum radiatum*.

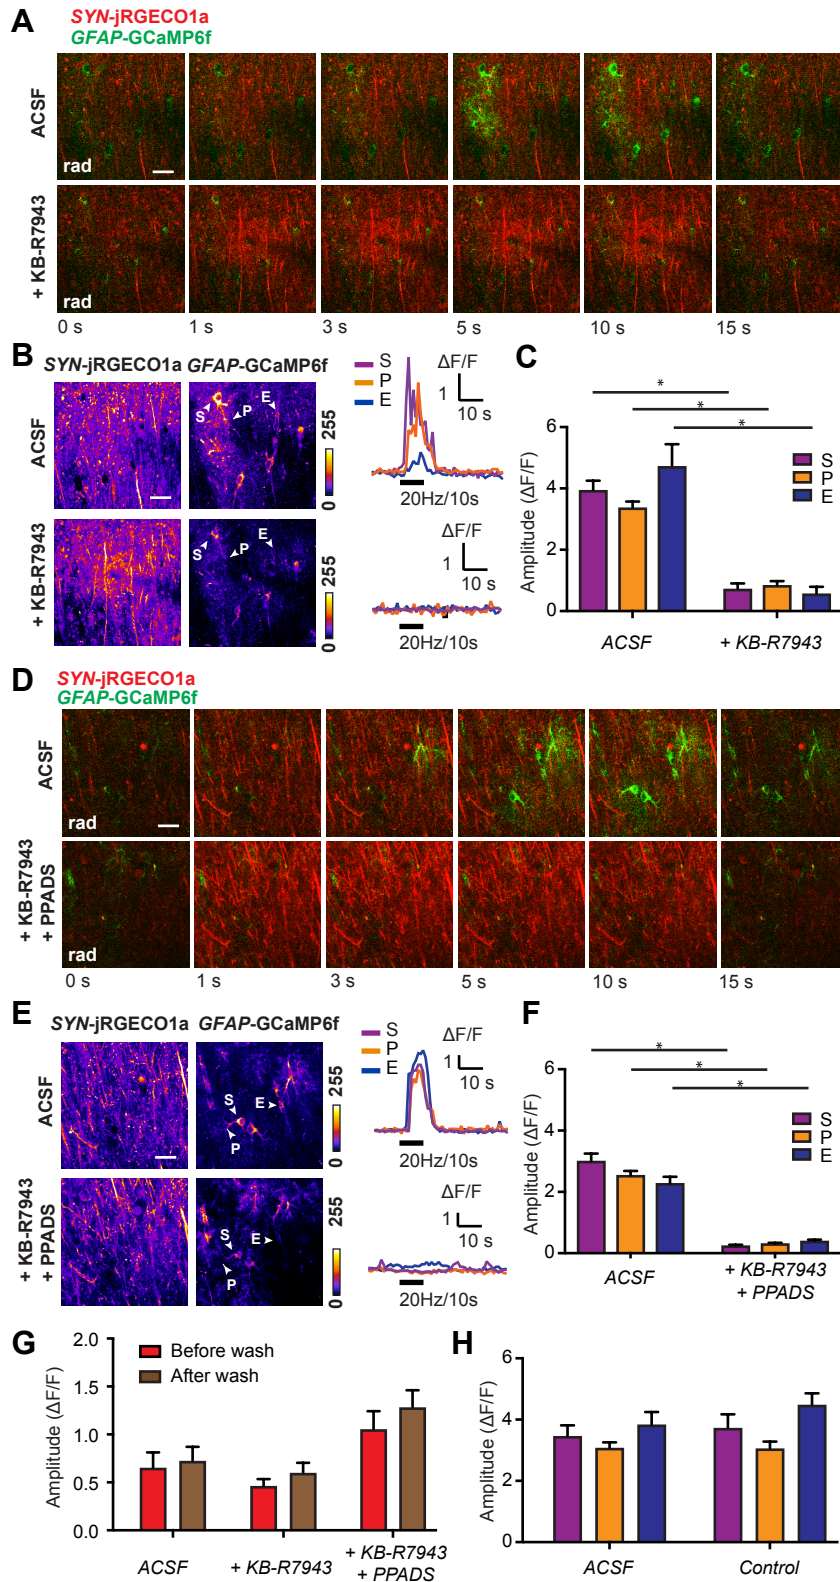

**Figure 3. Increased astrocytic membrane  $\text{Ca}^{2+}$  permeability via NCX and P2XRs is essential for triggering neuronal-evoked astrocytic  $\text{Ca}^{2+}$  responses.** (A) Time series of *GFAP-GCaMP6f* (green) and *SYN-jRGECO1a* (red) fluorescence images from wild-type adult mice Scc stimulated at 20 Hz for 10 sec with only ACSF and with KB-R7943 (20  $\mu\text{M}$ ) in ACSF. (B) Left, standard deviation images of jRGECO1a and GCaMP6f fluorescence intensities from

above mentioned time series in a; right, traces of the astrocytic  $\text{Ca}^{2+}$  signals from the regions indicated with arrowheads in the images to the left. (C) Bar diagrams showing the amplitude ( $\Delta F/F$ ) of the GCaMP6f fluorescence increase in astrocytic compartments stimulated at 20Hz for 10 sec with only ACSF and with KB-R7943 in ACSF ( $P_{\text{treatment}} < 0.0001$ ,  $F_{\text{Genotype}}(1, 303) = 164.7$ ;  $P_{\text{interaction}} = 0.0290$ ,  $F_{\text{interaction}}(2, 303) = 3.583$ ,  $n_{\text{S-ACSF}} = 39$ ,  $n_{\text{S-KB-R7943}} = 39$ ,  $n_{\text{P-ACSF}} = 102$ ,  $n_{\text{P-KB-R7943}} = 103$ ,  $n_{\text{E-ACSF}} = 13$ ,  $n_{\text{E-KB-R7943}} = 13$ ). (D) Time series of *GFAP*-GCaMP6f (green) and *SYN*-jRGECO1a (red) fluorescence images from wild-type adult mice Scc stimulated at 20 Hz for 10 sec with only ACSF and with both KB-R7943 (20  $\mu\text{M}$ ) and PPADS (100  $\mu\text{M}$ ) in ACSF. (E) Left, standard deviation images of jRGECO1a and GCaMP6f fluorescence intensities from above mentioned time series in (D); right, traces of the astrocytic  $\text{Ca}^{2+}$  signals from the regions indicated with arrowheads in the images to the left. (F) Bar diagrams showing the amplitude ( $\Delta F/F$ ) of the GCaMP6f fluorescence increase in astrocytic compartments stimulated at 20Hz for 10 sec with only ACSF and with both KB-R7943 and PPADS in ACSF ( $P_{\text{treatment}} < 0.0001$ ,  $F_{\text{Genotype}}(1, 292) = 351.4$ ;  $P_{\text{interaction}} = 0.0306$ ,  $F_{\text{interaction}}(2, 292) = 3.528$ ,  $n_{\text{S-ACSF}} = 34$ ,  $n_{\text{S-KB-R7943-PPADS}} = 31$ ,  $n_{\text{P-ACSF}} = 82$ ,  $n_{\text{P-KB-R7943-PPADS}} = 77$ ,  $n_{\text{E-ACSF}} = 37$ ,  $n_{\text{E-KB-R7943-PPADS}} = 37$ ). (G) Bar diagrams showing with 20 Hz for 10 sec stimulation, the amplitude ( $\Delta F/F$ ) of jRGECO1a signals in neurons with only ACSF ( $P = 0.8750$ ,  $n = 4$ ), with KB-R7943 ( $P = 0.1289$ ,  $n = 9$ ), and with both KB-R7943 and PPADS ( $P = 0.0625$ ,  $n = 6$ ) blockage. (H) Bar diagrams showing with 20 Hz for 10 sec stimulation, the amplitude ( $\Delta F/F$ ) of astrocytic GCaMP6f signals in astrocytic compartments 1hour after ACSF wash (as the control for drug wash-in step,  $P_{\text{interaction}} = 0.5716$ ,  $F_{\text{interaction}}(2, 242) = 0.5607$ ,  $P_{\text{treatment}} = 0.2662$ ,  $F_{\text{treatment}}(1, 242) = 1.242$ ,  $n_{\text{S-ACSF}} = 30$ ,  $n_{\text{S-Control}} = 34$ ,  $n_{\text{P-ACSF}} = 68$ ,  $n_{\text{P-Control}} = 72$ ,  $n_{\text{E-ACSF}} = 22$ ,  $n_{\text{E-KB-Control}} = 22$ ). Asterisk in (C) and (F) indicates values that differ significantly from each other. Scale bar, 10  $\mu\text{m}$ . rad, *stratum radiatum*; S, somata; P, processes; E, endfeet. Black bar indicates the electrical Scc stimulation.

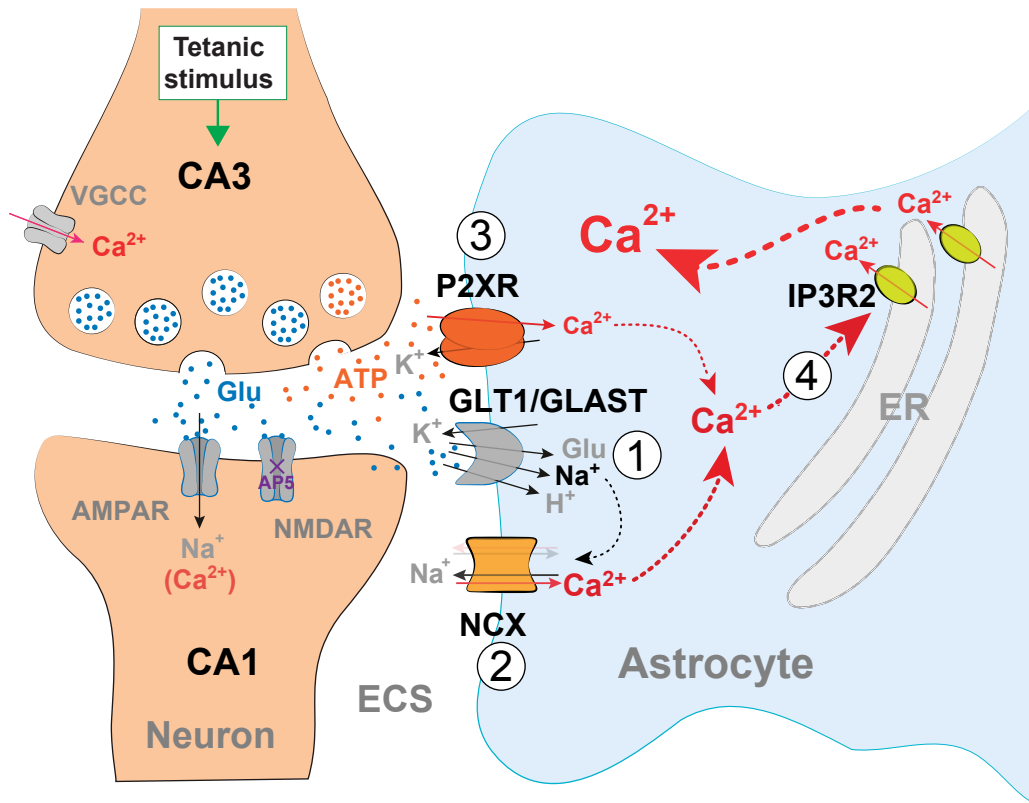

**Figure 4. Astrocytic membrane Ca<sup>2+</sup> permeability through NCX and P2XRs governs Ca<sup>2+</sup>-induced Ca<sup>2+</sup> release through IP3R2 upon local neuronal stimulations. (1)** The neuronal released glutamate (Glu) binds to glutamate transporters (GLT1/GLAST) on astrocytic membranes, and this could cause rapid Na<sup>+</sup> influx to the astrocytes. **(2)** The elevated intracellular Na<sup>+</sup> concentration in astrocytes could change the NCX from its forward mode (translucent arrows) to the reverse mode (solid arrows) and thus the import of Ca<sup>2+</sup> into astrocytes. **(3)** In addition, the neuronal released ATP can promote directly Ca<sup>2+</sup> influx at P2XR channels into astrocytes. **(4)** Together, the Ca<sup>2+</sup> entering through NCX and P2XRs facilitates the Ca<sup>2+</sup>-induced Ca<sup>2+</sup> release through IP3R2 on astrocytic ER.

## Supplementary Figure 1

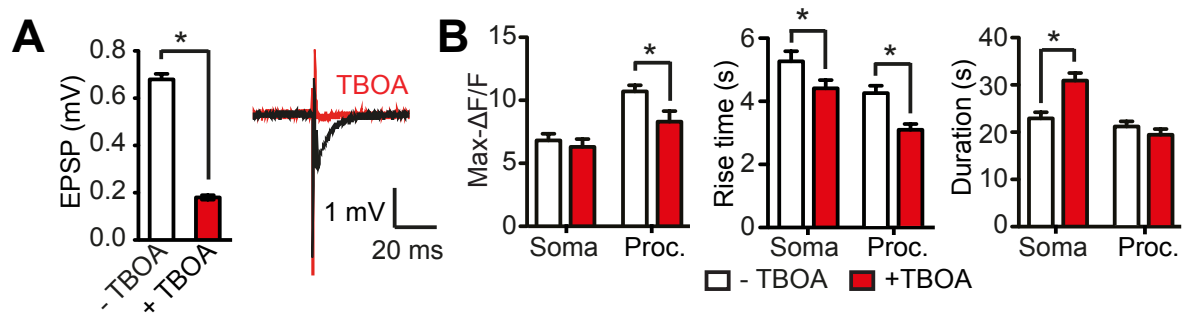

**(A)** Quantification of neuronal field EPSPs before and after DL-TBOA wash (left,  $P < 0.0001$ ,  $n = 7$ ) and representative traces (right). **(B)** After the DL-TBOA application, the maximum  $\Delta F/F$  values dropped significantly in the processes ( $P = 0.0020$ ,  $n = 60$ ), rise time decreased in both soma and processes areas ( $P_{\text{soma}} = 0.0188$ ,  $n = 41$ ,  $P_{\text{processes}} < 0.0001$ ,  $n = 60$ ). The activation duration was increased in the soma after DL-TBOA wash in ( $P < 0.0001$ ,  $n = 60$ ) whereas in the processes it was not significantly changed ( $P = 0.1498$ ,  $n = 60$ ).

## Supplementary Figure 2.

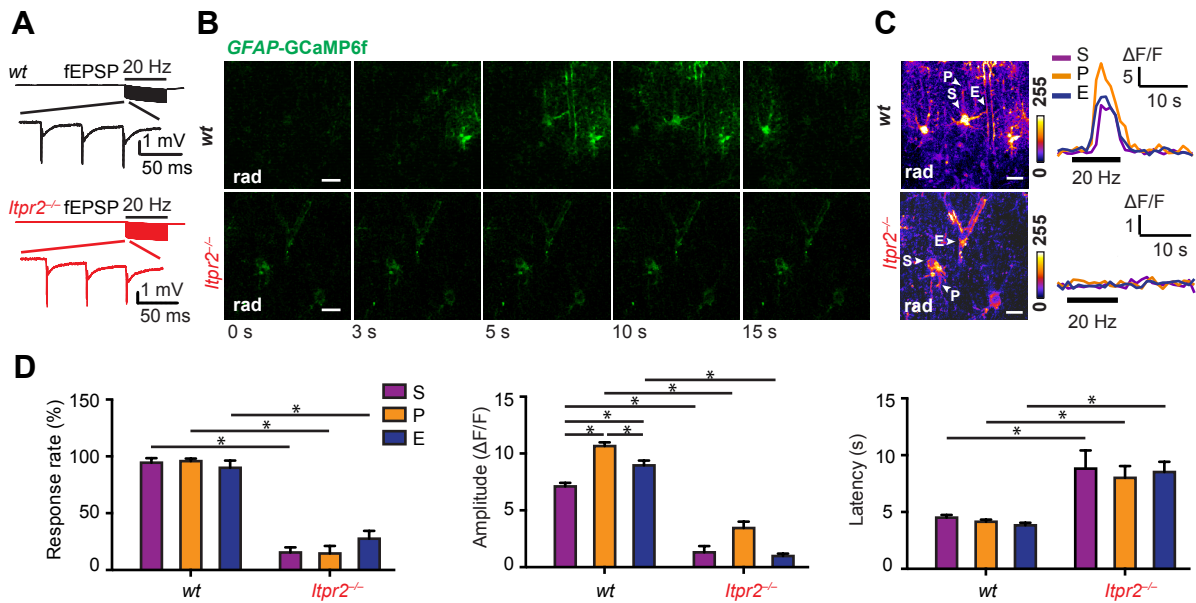

**Neuronal stimulation-evoked astrocytic Ca<sup>2+</sup> elevation is abolished by inositol triphosphate type 2 receptor (IP3R2) deletion revealed by GFAP-GCaMP6f fluorescence.** (A) The fEPSPs (expanded in bottom trace) recorded during 20 Hz, 10 seconds stimulation in wild-type (*wt*, traces in black) and *Itpr2<sup>-/-</sup>* (traces in red) mice. (B) Time series of GFAP-GCaMP6f fluorescence images from two genotypes (*wt* and *Itpr2<sup>-/-</sup>*) during the electrical stimulation (20 Hz, 10 s) of the Schaffer collateral/commissural fibres (ScC). Scale bar, 10 μm, rad, *stratum radiatum*. (C) Left, standard deviation images of GFAP-GCaMP6f fluorescence intensities during electrical stimulation (20 Hz, 10 s) in *wt* and *Itpr2<sup>-/-</sup>* mice. Scale bar, 10 μm; rad, *stratum radiatum*; right, representative fluorescence traces from astrocytic compartments indicated in corresponding images on the left. S, somata; P, processes; E, endfeet. (D) Response rate (two-way ANOVA,  $P_{\text{Genotype}} < 0.0001$ ,  $F_{\text{Genotype}}(1, 107) = 294.2$ ;  $n_{\text{wt-S}} = 20$ ,  $n_{\text{wt-P}} = 20$ ,  $n_{\text{wt-E}} = 20$ ,  $n_{\text{Itpr2<sup>-/-</sup>-C}} = 18$ ,  $n_{\text{Itpr2<sup>-/-</sup>-P}} = 17$ ,  $n_{\text{Itpr2<sup>-/-</sup>-E}} = 18$ ), amplitude (two-way ANOVA,  $P_{\text{Genotype}} < 0.0001$ ,  $F_{\text{Genotype}}(1, 453) = 139.4$ ;  $P_{\text{Compartment}} = 0.0004$ ,  $F_{\text{Compartment}}(2, 453) = 7.993$ ;  $n_{\text{wt-S}} = 130$ ,  $n_{\text{wt-P}} = 159$ ,  $n_{\text{wt-E}} = 115$ ,  $n_{\text{Itpr2<sup>-/-</sup>-C}} = 11$ ,  $n_{\text{Itpr2<sup>-/-</sup>-P}} = 17$ ,  $n_{\text{Itpr2<sup>-/-</sup>-E}} = 27$ ), and latency (two-way ANOVA,  $P_{\text{Genotype}} < 0.0001$ ,  $F_{\text{Genotype}}(1, 464) = 99.03$ ;  $n_{\text{wt-S}} = 128$ ,  $n_{\text{wt-P}} = 171$ ,  $n_{\text{wt-E}} = 115$ ,  $n_{\text{Itpr2<sup>-/-</sup>-C}} = 11$ ,  $n_{\text{Itpr2<sup>-/-</sup>-P}} = 18$ ,  $n_{\text{Itpr2<sup>-/-</sup>-E}} = 27$ ) of neuronal stimulation-evoked (20 Hz, 10 s) GCaMP6f fluorescence responses in astrocytic somata (S), processes (P) and endfeet (E) in *wt* and *Itpr2<sup>-/-</sup>* mice. Asterisks and lines indicate values that differ significantly from each other (response rate, Sidak's multiple comparisons test,  $P < 0.05$ ; amplitude, Tukey's multiple comparisons test,  $P < 0.05$ ; latency, Sidak's multiple comparisons test,  $P < 0.05$ ).
